# Supplementary material for: Using site-directed mutagenesis to probe the role of the D2 carotenoid in the secondary electron-transfer pathway of photosystem II
Source: PubMed Central journal article supplement (PMC3961632; doi:10.1007/s11120-013-9793-6), 2013-01-21
Supplement: 11120_2013_9793_MOESM1_ESM.pdf [file 11120_2013_9793_MOESM1_ESM.pdf]

## Supplementary Material

### Using Site-Directed Mutagenesis to Probe the Role of the D2 Carotenoid in the Secondary Electron-Transfer Pathway of Photosystem II

*Katherine E. Shinopoulos,<sup>1</sup> Jianfeng Yu,<sup>2</sup> Peter J. Nixon<sup>2</sup> and Gary W. Brudvig\*<sup>1</sup>*

<sup>1</sup>*Department of Chemistry, Yale University, New Haven, CT 06520-8107, USA and*

<sup>2</sup>*Division of Molecular Biosciences, Sir Ernst Chain Building – Wolfson Laboratories, Imperial College London, S. Kensington Campus, London, SW7 2AZ, UK.*

\*To whom correspondence should be addressed.

E-mail, [gary.brudvig@yale.edu](mailto:gary.brudvig@yale.edu), phone (203) 432-5202, fax (203) 432-6144

#### **Contents:**

Gaussian deconvolutions of the T50F and G47F PSII near-IR spectra at 0 and 3 hours of dark incubation

The Gaussian deconvolutions of the T50F and G47F PSII near-IR spectra at 0 and 3 hours of dark incubation are shown in Figure S1. They are analogous to the deconvolutions of the WT and G47W PSII near-IR spectra shown in Figure 5 of the main paper. The deconvolutions of the G47F near-IR spectra fit slightly less well than the others due to a lower concentration of Chl in the sample and a small signal in the raw data. The T50F displays a similar ratio of longer- and shorter-wavelength components as WT PSII.

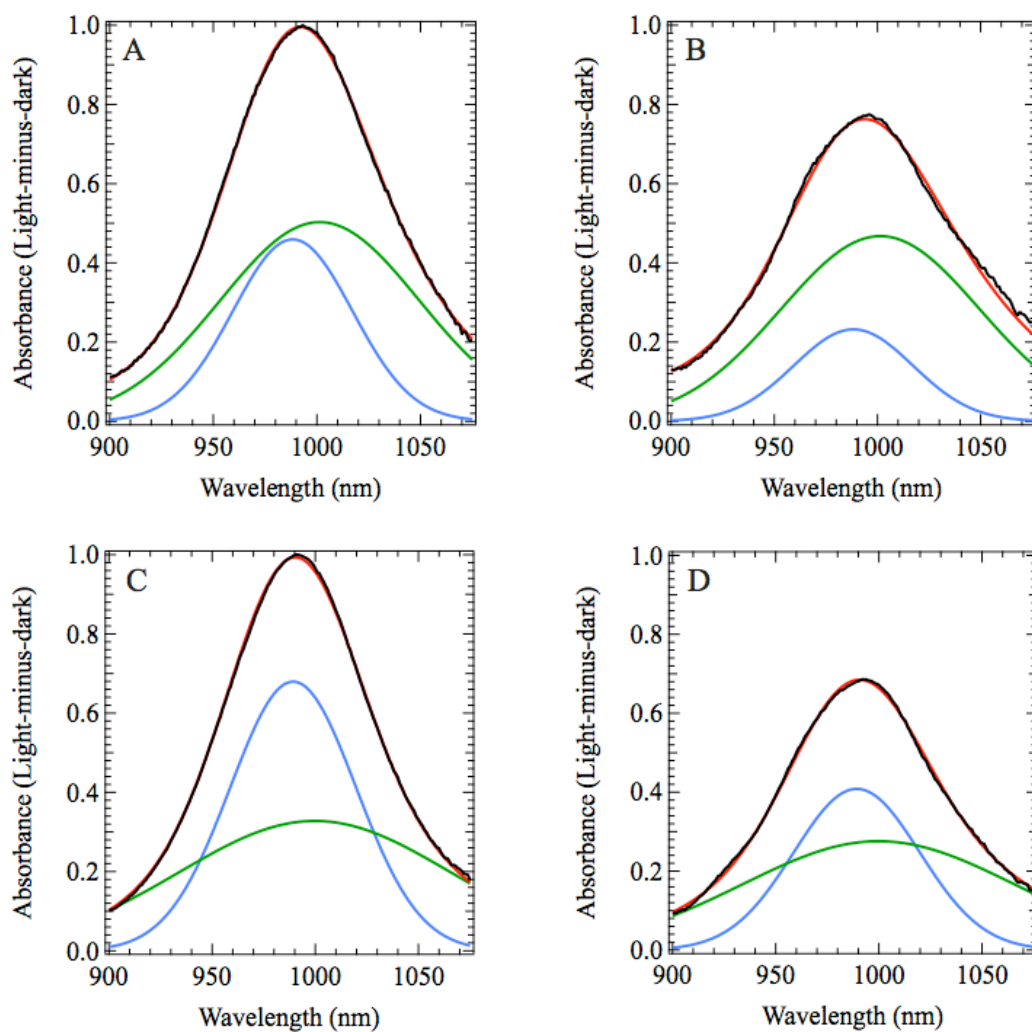

**Fig. S1** Gaussian deconvolutions of A: the G47F PSII difference spectrum after 0 minutes of dark incubation, B: the G47F PSII difference spectrum after 3 hours of dark incubation, C: the T50F PSII difference spectrum after 0 minutes of dark incubation, and D: the T50F PSII difference spectrum after 3 hours of dark incubation. The two Gaussian components are shown in blue (shorter-wavelength component) and green (longer-wavelength component), their sum is shown in red, and the raw data are shown in black.
